# Supplementary material for: RNA-Seq Perspectives to Improve Clinical Diagnosis
Source: PubMed Central journal article supplement (PMC6861419; doi:10.3389/fgene.2019.01152), 2019-11-12
Supplement: DataSheet_1.pdf [file DataSheet_1.pdf]

## Supplementary Material

### 1 Supplementary Figures and Tables

#### 1.1 Supplementary Figures

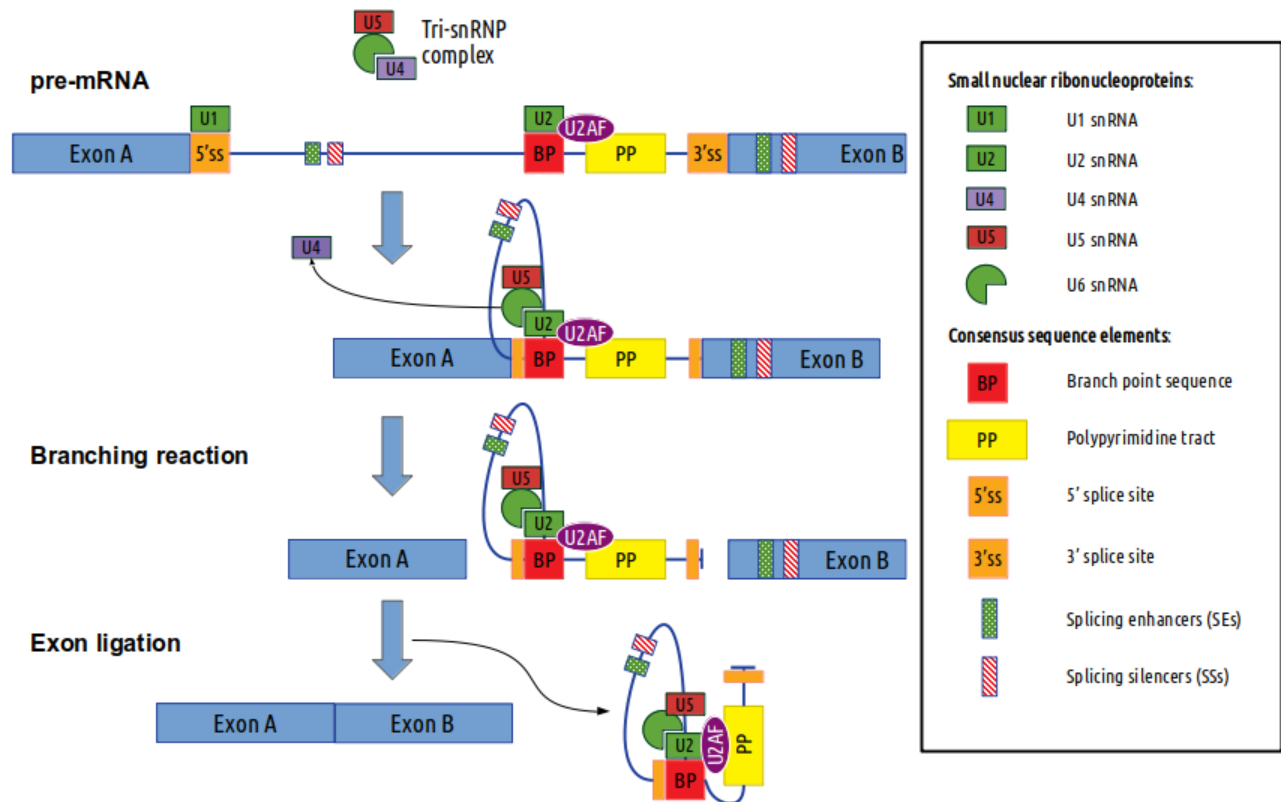

**Supplementary Figure 1. RNA splicing process.** Splicing can be divided into two main steps: the branching reaction that generates a free the 5'-exon and an intron lariat-3'-exon intermediate; and exon ligation that joins the 5'-exon and the 3'-exon while removing the intron lariat. The assembly of the spliceosome begins with the recognition and binding of the 5'-splice site by U1 small nuclear ribonucleoprotein (snRNP), the branch point sequence by U2 snRNP, and the polypyrimidine tract by U2 auxiliary factor (U2AF), which facilitates correct U2 binding. U2 recruits a tri-snRNP complex containing U4, U5 and U6 to form the fully assembled complex. Activation of the spliceosome requires the dissociation of U4 snRNP, allowing U6 to replace U1 at the 5'-splice site and leading to a U6-U2 interaction that brings the 5'-splice site and the branch point close together. Once activated, the branching reaction and exon ligation occur, U5 brings the two exons into close proximity and allows exon ligation.

## 1.2 Supplementary Tables

**Supplementary Table 1.** Different examples of Mendelian disorders associated with transcriptional perturbations

| Disease                                                                                 | Gene   | Mutation                                                           | Molecular mechanism                                                                              | Splicing effect                                                          | Reference                                 |
|-----------------------------------------------------------------------------------------|--------|--------------------------------------------------------------------|--------------------------------------------------------------------------------------------------|--------------------------------------------------------------------------|-------------------------------------------|
| <b>cis-regulatory elements</b>                                                          |        |                                                                    |                                                                                                  |                                                                          |                                           |
| Spinal muscular atrophy (SMA) and medium-chain acyl CoA dehydrogenase deficiency (MCAD) | SMN2   | C > T transition at position +6                                    | Creates an ESS allowing a binding site for hnRNPA1                                               | Exon 7 skipping                                                          | (Kashima et al. 2007)                     |
| Frontotemporal dementia with parkinsonism linked to chromosome 17 (FTDP-17)             | MAPT   | c.892A>G                                                           | Abrogates an ESS                                                                                 | Exon 10 inclusion                                                        | (Iovino et al. 2014)                      |
| Hutchinson-Gilford progeria syndrome (HGPS)                                             | LMNA   | c.1824C>T                                                          | Alternative 5' splice site                                                                       | 150 nt deletion in exon 11                                               | (Eriksson et al. 2003)                    |
| Familial dysautonomia (FD)                                                              | IKBKAP | c.2204+6 T>C                                                       | Disrupts binding of U1 to the 5'-splice site                                                     | Exon 20 skipping                                                         | (Cheishvili et al. 2007)                  |
| Menkes disease (MNK)                                                                    | ATP7A  | Substitutions at IVS6                                              | Alternative donor splice site                                                                    | Exon skipping of exon 6 or exon 6 and 7                                  | (Møller et al. 2002)                      |
| Menkes disease (MNK)                                                                    | ATP7A  | Substitutions at IVS6                                              | Activation of a cryptic donor splice site                                                        | Exon 6 enlarged with 50bp, leading to frameshift                         | (Møller et al. 2002)                      |
| Myotonic dystrophy type I (DM1)                                                         | DMPK   | CTG expansion in the 3' UTR                                        | Repeat containing transcripts accumulate in nuclei and alter the function of RNA binding protein | Alternative splice deregulation                                          | (Kuyumcu-Martinez, Wang, and Cooper 2007) |
| Prostate cancer progression                                                             | KLF6   | IVS1 – 27 G>A/IVSΔA                                                | Novel functional SRp40 DNA binding site, ablating two other overlapping SR-protein binding sites | New isoforms that act as a dominant negative                             | (Narla et al. 2005)                       |
| GISTs                                                                                   | KIT    | 25-bp deletion of exon 11                                          | Novel 3'-splice acceptor site                                                                    | Constitutive activation of a mis-spliced KIT isoform                     | (Chen et al. 2005)                        |
| Spinal muscular atrophy (SMA)                                                           | SMN1   | c.922+6 G>T                                                        | Disrupts the 5' splice donor site                                                                | Exon skipping                                                            | (Lorson et al. 1999)                      |
| Breast cancer                                                                           | BRCA1  | G > T substitution at nucleotide 5199                              | Abrogates a putative ESE                                                                         | Exon 18 skipping                                                         | (Mazoyer et al. 2002)                     |
| Ehlers-Danlos syndrome (EDS)                                                            | COL5A1 | IVS6-2A>G                                                          | Disrupts the acceptor splice site                                                                | Exon 7 skipping                                                          | (Symoens et al. 2011)                     |
| Congenital cataract                                                                     | MIP    | c.606+1G>A (IVS3)                                                  | Novel splice site                                                                                | Exon 3 skipping                                                          | (Zeng et al. 2013)                        |
| SCOT deficiency                                                                         | OXCT1  | c.1248+5G>A (IVS13)                                                | Disrupts the donor splice site                                                                   | Exon 12 and 13 skipping                                                  | (Hori et al. 2013)                        |
| Neurofibromatosis type 1 (NF1)                                                          | NF1    | G-to-A transition at position +1 of the 5' splice site of exon 12a | Abrogates the 5' splice site of exon 12a                                                         | Exon 11 and 12a skipping                                                 | (Fang et al. 2001)                        |
| Duchenne muscular dystrophy (DMD)                                                       | DMD    | Intron 45+1G>A                                                     | Activation of cryptic donor splice site                                                          | Partial loss of exon 45                                                  | (Habara et al. 2009)                      |
| <b>trans-acting protein factors</b>                                                     |        |                                                                    |                                                                                                  |                                                                          |                                           |
| Dilated cardiomyopathy (DCM)                                                            | RBM20  | c.1962T>G                                                          | Alteration of RNA binding domain R/S                                                             | Aberrant splicing of TTN gene                                            | (Guo et al. 2013)                         |
| <b>Spliceosome assembly</b>                                                             |        |                                                                    |                                                                                                  |                                                                          |                                           |
| Autosomal dominant retinitis pigmentosa (adRP)                                          | PRPF6  | c.2185C>T                                                          | Altered nuclear localization                                                                     | Affected U4/U6 interaction leading to alteration of spliceosome assembly | (Tanackovic et al. 2011)                  |
